# Supplementary material for: Large-Scale Brain Networks Underlying Successful and Unsuccessful Encoding, Maintenance, and Retrieval of Everyday Scenes in Visuospatial Working Memory
Source: PubMed Central journal article supplement (PMC6379313; doi:10.3389/fpsyg.2019.00233), 2019-02-12
Supplement: Table_1.pdf [file Table_1.pdf]

**Large-scale brain networks underlying successful and unsuccessful encoding, maintenance, and retrieval of everyday scenes in visuospatial working memory**

Valerio Santangelo<sup>1,2</sup> and Cecile Bordier<sup>3</sup>

1) Dept. of Philosophy, Social Sciences and Education, University of Perugia, Italy

2) Neuroimaging Laboratory, Santa Lucia Foundation, Rome, Italy

3) Center for Neuroscience and Cognitive Systems, Istituto Italiano di Tecnologia, Rovereto, Italy

SUPPLEMENTARY MATERIAL

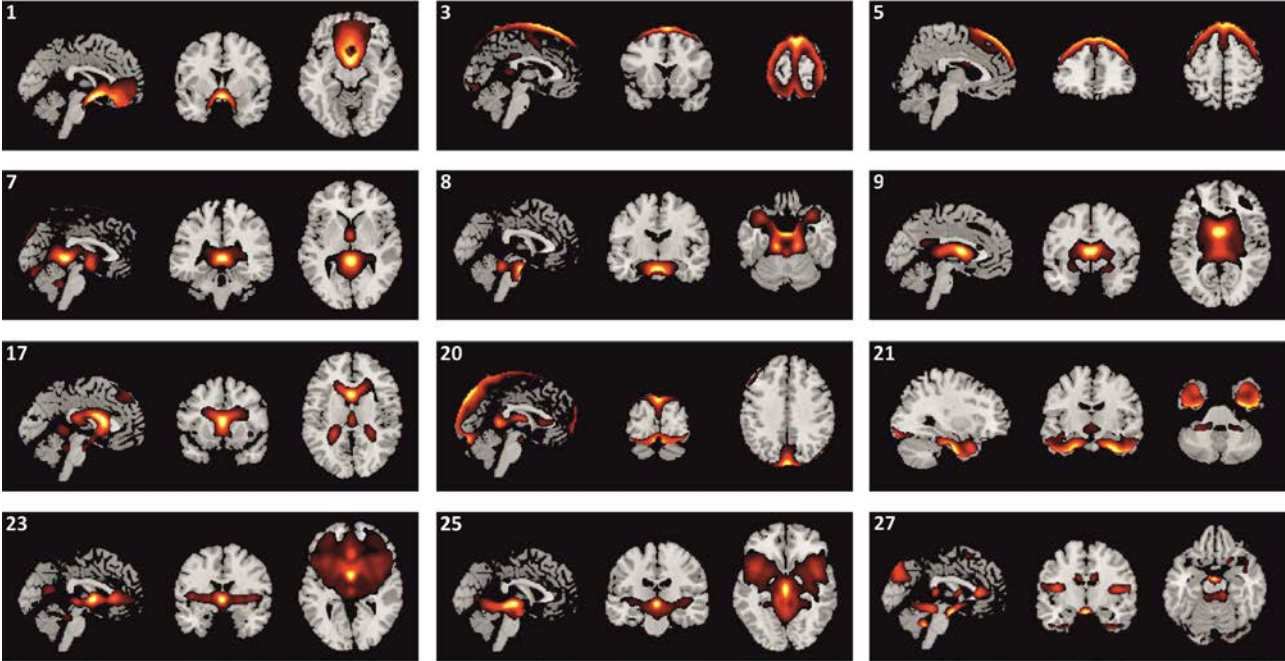

**Figure S1:** Discarded independent components.

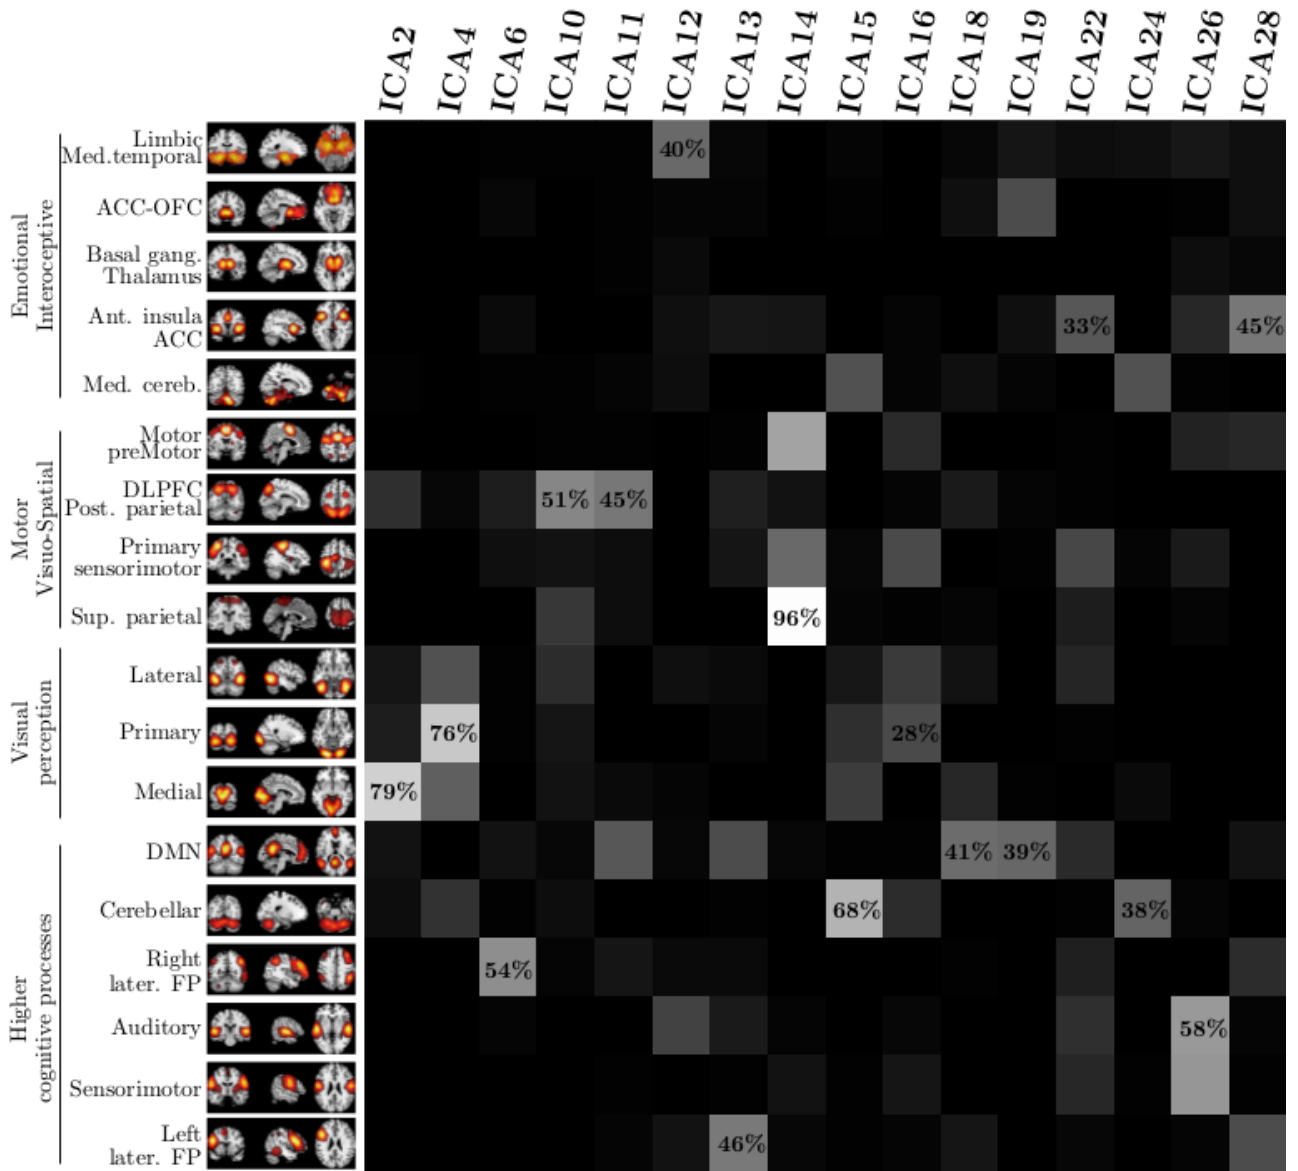

**Figure S2:** Percentage of overlap of the 16 unnoisy independent components (IC) with the correspondent BrainMap IC.

**Table S1:** Anatomical localizations, corresponding Brodmann area(s), volume (cc), maximum Z-scores and Talairach coordinates (obtained using the Talairach utility provided in GIFT toolbox on group-ICA components maps) of task-related independent components (IC).

| <b>Brain network</b> | <b>IC</b>           | <b>Area</b>              | <b>Brodmann Area</b> | <b>Volume (cc)</b> | <b>Max Z-score &amp; Talairach (x, y, z) L/R</b> |                                      |
|----------------------|---------------------|--------------------------|----------------------|--------------------|--------------------------------------------------|--------------------------------------|
| <i>Attention</i>     | 6                   | Inferior Parietal Lobule | 7, 40                | NA/3.7             | NA/5.5 (48, -50, 52)                             |                                      |
|                      |                     | Middle Frontal Gyrus     | 8, 9, 10, 11         | NA/2.6             | NA/4.6 (46, 48, -11)                             |                                      |
|                      |                     | Superior Parietal Lobule | 7                    | NA/0.4             | NA/4.6 (42, -58, 51)                             |                                      |
|                      |                     | Superior Frontal Gyrus   | 10                   | NA/0.4             | NA/4.1 (36, 60, -5)                              |                                      |
|                      |                     | Inferior Frontal Gyrus   | 10                   | NA/0.1             | NA/3.7 (50, 44, -11)                             |                                      |
|                      |                     | Supramarginal Gyrus      | *                    | NA/0.1             | NA/3.6 (51, -51, 36)                             |                                      |
|                      | 10                  | Precuneus                | 7, 19                | 0.7/1.3            | 4.4 (-6, -61, 62)/5.3 (16, -63, 62)              |                                      |
|                      |                     | Superior Parietal Lobule | 7                    | 1.1/1.9            | 4.5 (-18, -67, 57)/5.0 (20, -69, 57)             |                                      |
|                      |                     | Postcentral Gyrus        | 7                    | NA/0.1             | NA/4.0 (10, -53, 67)                             |                                      |
|                      |                     | Cuneus                   | 19                   | NA/0.1             | NA/3.6 (24, -86, 37)                             |                                      |
|                      | 11                  | Precuneus                | 7, 31                | 7.9/8.1            | 7.5 (0, -64, 46)/7.3 (4, -70, 42)                |                                      |
|                      |                     | Cingulate Gyrus          | 23, 24, 31           | 4.4/4.7            | 6.3 (0, -35, 29)/6.6 (2, -39, 30)                |                                      |
|                      |                     | Cuneus                   | 7                    | 0.4/0.3            | 5.4 (-4, -66, 33)/4.1 (4, -76, 37)               |                                      |
|                      |                     | Posterior Cingulate      | 23, 30               | 0.3/0.4            | 4.8 (-2, -43, 24)/4.9 (2, -42, 22)               |                                      |
|                      |                     | Superior Parietal Lobule | 7                    | NA/0.1             | NA/3.9 (8, -67, 53)                              |                                      |
|                      |                     | Inferior Parietal Lobule | 40                   | NA/0.1             | NA/3.6 (42, -62, 45)                             |                                      |
|                      | 13                  | Inferior Parietal Lobule | 7, 39, 40            | 2.1/NA             | 4.5 (-50, -58, 38)/NA                            |                                      |
|                      |                     | Angular Gyrus            | 39                   | 0.8/NA             | 4.4 (-50, -59, 34)/NA                            |                                      |
|                      |                     | Supramarginal Gyrus      | *                    | 0.4/NA             | 4.2 (-51, -59, 31)/NA                            |                                      |
|                      |                     | Middle Temporal Gyrus    | 39                   | 0.3/NA             | 3.8 (-61, -41, -1)/NA                            |                                      |
|                      |                     | Superior Temporal Gyrus  | 39                   | 0.3/NA             | 3.8 (-51, -59, 27)/NA                            |                                      |
|                      |                     | Inferior Frontal Gyrus   | 47                   | 0.3/NA             | 3.8 (-50, 21, -8)/NA                             |                                      |
|                      |                     | Superior Parietal Lobule | 7                    | 0.1/NA             | 3.7 (-40, -62, 51)/NA                            |                                      |
|                      |                     | Middle Frontal Gyrus     | *                    | 0.1/NA             | 3.6 (-48, 42, -9)/NA                             |                                      |
|                      | <i>Default mode</i> | 18                       | Posterior Cingulate  | 23, 29, 30, 31     | 2.6/2.9                                          | 5.1 (0, -53, 19)/5.4 (12, -54, 16)   |
|                      |                     |                          | Sub-Gyral            | *                  | 0.2/0.4                                          | 4.8 (-10, -57, 18)/4.7 (12, -57, 19) |
|                      |                     |                          | Extra-Nuclear        | *                  | 0.1/0.2                                          | 3.9 (-12, -55, 21)/4.7 (18, -55, 19) |
|                      |                     | Precuneus                | 23, 31               | 1.1/0.5            | 4.4 (-4, -59, 21)/4.1 (12, -59, 23)              |                                      |
|                      |                     | Cingulate Gyrus          | 31                   | 0.2/0.1            | 4.1 (0, -57, 27)/3.8 (4, -59, 27)                |                                      |
|                      |                     | Parahippocampal Gyrus    | *                    | NA/0.1             | NA/3.6 (10, -46, 4)                              |                                      |
| 19                   |                     | Medial Frontal Gyrus     | 9, 10                | 1.9/1.3            | 4.6 (-4, 51, 9)/4.4 (4, 53, 10)                  |                                      |
|                      |                     | Anterior Cingulate       | 32                   | 0.6/0.2            | 4.4 (-4, 47, 9)/4.3 (4, 49, 9)                   |                                      |
|                      |                     | Precuneus                | 31                   | 0.1/NA             | 3.8 (0, -49, 32)/NA                              |                                      |
|                      |                     | Cingulate Gyrus          | *                    | 0.1/NA             | 3.6 (0, -49, 28)/NA                              |                                      |
| <i>Salience</i>      | 12                  | Superior Temporal Gyrus  | 22, 38               | 4.4/3.8            | 8.8 (-42, 9, -17)/8.3 (40, 13, -19)              |                                      |
|                      |                     | Middle Temporal Gyrus    | 21, 38               | 1.0/2.3            | 6.9 (-48, 5, -15)/6.2 (48, 7, -15)               |                                      |
|                      |                     | Sub-Gyral                | 13, 21               | 1.5/1.8            | 6.6 (-46, -3, -13)/6.1 (46, 3, -15)              |                                      |
|                      |                     | Uncus                    | 28, 34               | 0.6/0.5            | 5.3 (-32, 3, -19)/6.5 (28, 9, -21)               |                                      |
|                      |                     | Inferior Frontal Gyrus   | 47                   | 0.6/0.6            | 5.1 (-34, 13, -16)/6.5 (36, 13, -17)             |                                      |
|                      |                     | Third Ventricle          | *                    | NA/0.2             | NA/6.1 (0, -6, -8)                               |                                      |
|                      |                     | Parahippocampal Gyrus    | 34                   | 0.4/0.3            | 4.4 (-30, -1, -18)/5.1 (24, 3, -17)              |                                      |

|                        |                            |                         |                                    |                                        |                                  |
|------------------------|----------------------------|-------------------------|------------------------------------|----------------------------------------|----------------------------------|
|                        | Extra-Nuclear              | *                       | 0.1/NA                             | 4.0 (-4, -6, -8)/NA                    |                                  |
|                        | Anterior Cingulate         | *                       | 0.1/NA                             | 3.7 (0, 5, -10)/NA                     |                                  |
| <i>Visual</i>          | 22 Superior Temporal Gyrus | 22, 38                  | NA/0.4                             | NA/4.4 (50, 17, -9)                    |                                  |
|                        | Inferior Frontal Gyrus     | 47                      | NA/0.3                             | NA/4.0 (46, 15, -7)                    |                                  |
|                        | Inferior Parietal Lobule   | 40                      | 0.3/NA                             | 3.7 (-59, -35, 31)/NA                  |                                  |
|                        | 28 Cingulate Gyrus         | 32                      | 0.8/0.8                            | 4.9 (0, 29, 32)/4.6 (4, 21, 41)        |                                  |
|                        | Medial Frontal Gyrus       | 6, 8, 9                 | 0.4/0.5                            | 4.1 (-4, 22, 43)/4.5 (4, 25, 39)       |                                  |
|                        | Superior Temporal Gyrus    | 38                      | 0.2/0.1                            | 4.2 (-48, 15, -9)/3.7 (48, 17, -11)    |                                  |
|                        | Superior Frontal Gyrus     | 8                       | 0.2/0.3                            | 3.7 (-2, 20, 51)/4.2 (2, 20, 51)       |                                  |
|                        | Anterior Cingulate         | 32                      | 0.4/0.3                            | 3.9 (0, 34, 20)/4.1 (4, 32, 24)        |                                  |
|                        | Inferior Frontal Gyrus     | 47                      | 0.1/NA                             | 3.9 (-44, 15, -9)/NA                   |                                  |
|                        | 2 Cuneus                   | 7, 17, 18, 19, 23, 30   | 8.9/7.9                            | 7.2 (-2, -69, 9)/7.2 (2, -73, 13)      |                                  |
|                        | Lingual Gyrus              | 18, 19                  | 4.2/3.9                            | 6.9 (-10, -60, 5)/5.8 (4, -72, 4)      |                                  |
|                        | Posterior Cingulate        | 23, 30, 31              | 2.4/2.5                            | 6.5 (-6, -69, 13)/6.9 (6, -69, 11)     |                                  |
|                        | Precuneus                  | 7, 19, 31               | 1.0/2.0                            | 4.8 (-2, -69, 20)/6.0 (6, -69, 18)     |                                  |
|                        | Culmen                     | *                       | 0.6/0.3                            | 5.5 (-8, -56, 1)/4.2 (16, -49, -3)     |                                  |
|                        | Extra-Nuclear              | *                       | NA/0.3                             | NA/4.6 (24, -58, 7)                    |                                  |
|                        | Parahippocampal Gyrus      | 19, 30                  | 0.3/0.4                            | 4.3 (-12, -48, 4)/4.5 (14, -50, 4)     |                                  |
|                        | 4 Fusiform Gyrus           | 18, 19                  | 1.6/1.0                            | 6.2 (-18, -90, -11)/5.7 (20, -88, -11) |                                  |
|                        | Inferior Occipital Gyrus   | 17, 18                  | 2.4/2.0                            | 6.1 (-14, -92, -9)/5.8 (24, -88, -11)  |                                  |
|                        | Lingual Gyrus              | 17, 18                  | 6.0/5.0                            | 5.9 (-18, -94, -9)/5.6 (16, -88, -9)   |                                  |
|                        | Cuneus                     | 17, 18                  | 2.6/2.0                            | 5.3 (-12, -97, 0)/5.1 (12, -95, 1)     |                                  |
|                        | Middle Occipital Gyrus     | 18, 19                  | 2.5/1.0                            | 5.1 (-22, -86, -7)/4.9 (26, -84, -8)   |                                  |
|                        | Declive                    | *                       | 0.4/0.1                            | 4.1 (-34, -82, -16)/3.8 (12, -80, -11) |                                  |
| Sub-Gyral              | *                          | 0.1/0.0                 | 3.7 (-24, -91, 0)/-999.0 (0, 0, 0) |                                        |                                  |
| <i>Visuo-cereb.</i>    | 16 Precentral Gyrus        | 4, 6                    | 2.5/NA                             | 5.7 (-40, -14, 62)/NA                  |                                  |
|                        | Postcentral Gyrus          | 1, 2, 3, 4              | 2.8/NA                             | 4.8 (-42, -15, 54)/NA                  |                                  |
|                        | Middle Frontal Gyrus       | *                       | 0.1/NA                             | 3.7 (-32, -7, 61)/NA                   |                                  |
|                        | 15 Culmen                  | *                       | 0.3/0.7                            | 3.7 (-32, -51, -19)/4.2 (4, -66, -7)   |                                  |
|                        | Declive                    | *                       | 0.6/0.4                            | 3.9 (-30, -71, -18)/4.1 (42, -57, -22) |                                  |
|                        | Culmen of Vermis           | *                       | 0.3/0.1                            | 4.0 (0, -66, -7)/4.0 (4, -62, -5)      |                                  |
|                        | Tuber                      | *                       | NA/0.1                             | NA/3.7 (44, -54, -24)                  |                                  |
|                        | Declive of Vermis          | *                       | NA/0.1                             | NA/3.6 (2, -74, -10)                   |                                  |
|                        | <i>Sensori-motor</i>       | 14 Medial Frontal Gyrus | 6, 32                              | 1.9/2.7                                | 5.8 (-2, -3, 48)/6.2 (2, -3, 48) |
|                        |                            | Cingulate Gyrus         | 24, 32                             | 1.0/1.6                                | 5.5 (-2, 0, 46)/5.7 (2, 0, 44)   |
| Paracentral Lobule     |                            | 5, 6, 31                | 0.3/0.4                            | 4.0 (-2, -11, 45)/4.2 (2, -11, 45)     |                                  |
| Superior Frontal Gyrus |                            | 6                       | 0.1/0.1                            | 4.1 (-2, 6, 48)/4.2 (2, 6, 49)         |                                  |
| Postcentral Gyrus      |                            | 1, 2, 3                 | NA/0.6                             | NA/3.9 (34, -32, 61)                   |                                  |
| <i>Auditory</i>        | Precentral Gyrus           | 4                       | NA/0.3                             | NA/3.7 (40, -19, 56)                   |                                  |
|                        | 26 Superior Temporal Gyrus | 13, 21, 22, 41, 42      | 7.1/6.5                            | 6.5 (-59, -7, 6)/7.8 (61, -9, 6)       |                                  |
|                        | Transverse Temporal Gyrus  | 41, 42                  | 1.6/1.2                            | 5.8 (-59, -9, 10)/6.6 (61, -17, 10)    |                                  |
|                        | Precentral Gyrus           | 4, 6, 13, 43            | 3.1/4.0                            | 6.2 (-59, -3, 13)/6.6 (57, -11, 10)    |                                  |
|                        | Insula                     | 13, 40                  | 1.9/2.8                            | 4.8 (-44, -13, 6)/5.5 (46, -13, 8)     |                                  |
|                        | Postcentral Gyrus          | 40, 43                  | 0.6/1.2                            | 5.2 (-57, -7, 17)/5.3 (61, -17, 14)    |                                  |
| Middle Temporal Gyrus  | 21                         | NA/0.1                  | NA/4.3 (61, -4, -3)                |                                        |                                  |

|                   |    |                       |   |         |                                        |
|-------------------|----|-----------------------|---|---------|----------------------------------------|
| <i>Cerebellar</i> |    | Parahippocampal Gyrus | * | NA/0.1  | NA/3.8 (20, -1, -17)                   |
|                   | 24 | Fourth Ventricle      | * | NA/0.5  | NA/14.3 (0, -48, -26)                  |
|                   |    | Culmen                | * | 1.2/1.7 | 8.5 (-4, -44, -20)/11.7 (4, -44, -21)  |
|                   |    | Nodule                | * | 0.6/0.8 | 10.0 (-4, -48, -30)/11.5 (0, -48, -30) |
|                   |    | Fastigium             | * | 0.3/0.3 | 6.7 (-4, -52, -21)/7.1 (8, -48, -21)   |
|                   |    | Cerebellar Lingual    | * | 0.1/0.3 | 3.9 (-4, -45, -16)/5.3 (0, -44, -16)   |
|                   |    | Cerebellar Tonsil     | * | 0.1/0.1 | 4.5 (-24, -33, -34)/3.9 (24, -33, -32) |
|                   |    | Declive               | * | 0.1/0.3 | 3.6 (-4, -63, -20)/3.7 (0, -63, -22)   |
